# Supplementary material for: cellMarkerPipe: Cell Marker Identification and Evaluation Pipeline in Single Cell Transcriptomes
Source: Research Square preprint supplement (doi:10.21203/rs.3.rs-3844718/v1), 2024-01-17
Supplement: Supplementary file 1 [file 2514fba90deee9bebb01941f.xlsx]

## Sheet: Sheet1
Supplementary Table 2. Single cell RNA dataset used in this study
Dataset Name	Species	Tissue	Number of cell types	NCBI dataset ID	Paper Pubmed ID
Zeisel	mouse	cortex	9	GSE60361	25700174
PBMC-10K	human	blood	10	10x website	28091601
Jurkat	human	jurkat,293T cell lines	2	10x website	28091601
Plant	arabidopsis	root	7	GSE122687	35211979
HumanGut	human	ileum	7	GSE125970	31753849
		colon	7	GSE125970	31753849
		rectum	7	GSE125970	31753849
MiceGut	mouse	ileum	8	GSE92332	29144463	30089906
		duodenum	8	GSE92332	29144463	30089906
		jejunum	8	GSE92332	29144463	30089906
GeneEditing	human	blood (unedited)	12	GSE204688	35922667
		blood (modified)	12	GSE204688	35922667
