# Supplementary material for: cellMarkerPipe: Cell Marker Identification and Evaluation Pipeline in Single Cell Transcriptomes
Source: Research Square preprint supplement (doi:10.21203/rs.3.rs-3844718/v1), 2024-01-17
Supplement: Supplementary file 3 [file 6881bdb9f333926f1eb5a2ce.xlsx]

## Sheet: All
Supplementary Table 4. Complete results and statistics for the human and mice gut tissues.
S4.1 Results on human colon
S4.2 Results on human ileum
S4.3 Results on human rectum
S4.4 Results on mice duodenum
S4.5 Results on mice ileum
S4.6 Results on mice jejunum

## Sheet: HumanGut_Colon
method	ari	jaccard	purity	nmi	fmi	precision	recall
COSG	0.328641	0.00729816	0.799642	0.514119	0.472129	0.185714	0.382353
SC3	0.354997	0.0104786	0.774821	0.500306	0.493681	0.0142857	0.0294118
Seurat	0.317223	0.0356026	0.788238	0.458506	0.460392	0.2	0.411765
SCMarker	0.279276	0.00536533	0.781753	0.478276	0.426594	0.2	0.411765
scGeneFit	0.353538	0.162094	0.761852	0.489144	0.492535	0.157143	0.323529
Comet	0.399993	0.0859854	0.798971	0.489919	0.532485	0.0963855	0.235294

## Sheet: HumanGut_Ileum
method	ari	jaccard	purity	nmi	fmi	precision	recall
COSG	0.181064	0.129926	0.889249	0.453019	0.432627	0.214286	0.441176
SC3	0.168164	0.0993213	0.848224	0.388532	0.419866	0	0
Seurat	0.112347	0.00597757	0.832009	0.36493	0.354779	0.197183	0.411765
SCMarker	0.11646	0.0105799	0.899627	0.411369	0.349128	0.2	0.411765
scGeneFit	0.0911048	0.0180928	0.83736	0.321306	0.317622	0.128571	0.264706
Comet	0.117899	0.00108621	0.880817	0.384744	0.356323	0.0574713	0.147059

## Sheet: HumanGut_Rectum
method	ari	jaccard	purity	nmi	fmi	precision	recall
COSG	0.387903	0.0328351	0.878368	0.607521	0.520951	0.228571	0.470588
SC3	0.43469	0.00701582	0.871183	0.599877	0.55744	0.0285714	0.0588235
Seurat	0.327088	0.0170261	0.803695	0.521186	0.461953	0.142857	0.294118
SCMarker	0.386142	0.073311	0.872723	0.601826	0.517656	0.2	0.411765
scGeneFit	0.518803	0.0923585	0.818322	0.609875	0.622197	0.114286	0.235294
Comet	0.379808	0.00449346	0.832179	0.566342	0.508931	0.116279	0.294118

## Sheet: MiceGut_Duodenum
method	ari	jaccard	purity	nmi	fmi	precision	recall
COSG	0.211821	0.0341503	0.654193	0.412392	0.360214	0.25	0.555556
SC3	0.230931	0.0136431	0.644108	0.431688	0.375155	0.1	0.222222
Seurat	0.122774	0.0365009	0.552017	0.314306	0.281766	0.25	0.555556
SCMarker	0.211184	0.0295993	0.680202	0.423552	0.354323	0.25	0.555556
scGeneFit	0.203056	0.0451262	0.551486	0.31639	0.371685	0.0666667	0.148148
Comet	0.23357	0.103819	0.650212	0.429045	0.38425	0.0833333	0.185185

## Sheet: MiceGut_Ileum
method	ari	jaccard	purity	nmi	fmi	precision	recall
COSG	0.348572	0.014299	0.780749	0.542441	0.459789	0.133333	0.296296
SC3	0.356244	0.0832934	0.727273	0.577212	0.469858	0.0666667	0.148148
Seurat	0.428198	0.0327572	0.790425	0.558195	0.52932	0.183333	0.407407
SCMarker	0.411189	0.0552176	0.798065	0.582539	0.514309	0.15	0.333333
scGeneFit	0.396285	0.0109751	0.681436	0.441043	0.51612	0.0666667	0.148148
Comet	0.394621	0.0220099	0.701808	0.516517	0.500797	0.0666667	0.148148

## Sheet: MiceGut_Jejunum
method	ari	jaccard	purity	nmi	fmi	precision	recall
COSG	0.228471	0.0310975	0.692695	0.435616	0.356044	0.2	0.444444
SC3	0.32515	0.00375071	0.661713	0.499282	0.452615	0	0
Seurat	0.180361	0.0396905	0.56272	0.352446	0.321881	0.245902	0.555556
SCMarker	0.252601	0.012089	0.662469	0.466402	0.382659	0.233333	0.518519
scGeneFit	0.224467	0.0250012	0.530227	0.3109	0.370943	0.05	0.111111
Comet	0.282168	0.00491687	0.679345	0.469614	0.412629	0.05	0.111111
