# Supplementary material for: cellMarkerPipe: Cell Marker Identification and Evaluation Pipeline in Single Cell Transcriptomes
Source: Research Square preprint supplement (doi:10.21203/rs.3.rs-3844718/v1), 2024-01-17
Supplement: Supplementary file 5 [file 858d48224c8c563c5f7ddfaa.xlsx]

## Sheet: All
Supplementary Table 5. Manually collected high confident marker genes for the benchmark datasets
S5.1. PBMC-10k
S5.2 Zeisel
S5.3 Jurkat
S5.4 Plant
S5.5 HumanGut
S5.6 MiceGut
S5.7 GeneEditing

## Sheet: PBMC-10K
cell type	marker genes (from Supplementary Figure 6 in original publication)	marker genes (from Supplementary Figure 7 in original publication)	marker genes (from Supplementary Figure 5 in original publication)	marker genes (from Figure 3d in original publication)	marker genes (from Seurat PBMC tutorial in section "Assigning cell type identity to clusters")	marker genes (in Section from original publication: Subpopulation discovery from a large immune population)
B	CD19	CD27	CD79A		MS4A1
cd34	CD34	CD34
cytotoxic_T		CD8A		NKG7, CD8A, CD3D	CD8A
helper_T	CD4
memory_T	CD4		CCR10	CD3D	IL7R, S100A4	CCR10
monocytes	CD14	FTL			CD14, LYZ
naive_cytotoxic_T				CD8A, CD3D	CD8A
naive_T	CD4			CD3D	IL7R, CCR7	ID3
nature_killer				NKG7	GNLY, NKG7
regular_T	CD4		CCR10	CD3D		TNFRSF18

## Sheet: Zeisel
cell type	marker genes (from Figure 1b, 4a, S5, and supporting information in the original publication)
Interneurons	Gad1, Gad2, Slc32a1, Slc6a1, Pnoc, Thy1
S1 Pyramidal	Tbr1, Gm11549, Thy1
CA1 Pyramidal	Spink8, Thy1, Fibcd1
Oligodendrocytes	Hapln2, Mbp, Tnfaip6
Microglia	Aif1, F13a1, C1qc
Endothelial	Ly6c1, Cldn5, Flt1
Astrocytes	Aldoc, Fabp7, Lcat
Ependymal	Ccdc153, Dynlrb2, Foxj1
Mural	Acta2, Mustn1

## Sheet: Jurkat
cell type	marker gene (from the section "Detection of individual populations in mixed samples" in original publication)
293T	XIST
Jurkat	CD3D

## Sheet: Plant
cell type	marker genes (from Figure 3A and 3B, and supplementary file 1-s2.0-S2211124719305273-mmc2.xlsx from the original publication)	TAIR ID (additional TAIR IDs not in previous geneID list)
non-hair cells (Atrichoblast)	GL2, WER, AGP31,H3.1,TGG5	AT1G79840, AT5G14750, AT1G28290, AT1G09200, AT1G51470 (AT2G40205)
Columella	RGF3	AT2G04025 (AT5G54370)
Cortex	ELP	AT1G12090 (AT5G16010)
Cortex/Hair cells	UGT74F2	AT2G43820 (AT4G12545)
Endodermis	SCR, RCI3A	AT3G54220, AT1G05260 (AT3G55230)
Stele	APL,MYB46,SUC2,WOL,CAM5,3xHMG-box2,PDF2.3	AT1G79430,AT5G12870,AT1G22710,AT2G01830,AT2G27030,AT4G23800,AT2G02130 (AT1G12080)
Hair cells (Trichoblast)	COBL9	AT5G49270 (AT3G54580)

## Sheet: HumanGut
cell type	marker genes (from the section in the original publication: Single-cell characterization of human intestinal epithelium)
Enterocyte (EC)	ALPI, SLC26A3, TMEM37, FABP2
Goblet (G)	ZG16, CLCA1, FFAR4, TFF3, SPINK4
Paneth like (PLC)	LYZ [Lyz1 and Lyz2 in mouse], CA7, SPIB, CA4, FKBP1A
Enteroendocrine (EEC)	CHGA, CHGB, CPE, NEUROD1, PYY
Progenitor (PRO)	SOX9, CDK6, MUC4, FABP5, PLA2G2A, LCN2
TA	KI67, PCNA, TOP2A, CCNA2, MCM5
Stem Cell (SC)	LGR5, RGMB, SMOC2, ASCL2

## Sheet: MiceGut
cell type	marker genes (from Extended Data Figure 2 in original publication)
Paneth	Lyz1, Defa17, Defa22, Defa24, Ang4, Mptx2
Tuft	Dclk1, Trpm5, Gfi1b, ll25
Goblet	Muc2,Clca3,Tff3,Agr2
EEC (Enteroendocrine)	Chga, Chgb, Tac1, Tph1, Neurog3
Stem	Lgr5, Ascl2, Slc12a2, Axin2, Olfm4, Gkn3
Enterocyte	Alpi, Apoa1, Apoa4, Fabp1

## Sheet: GeneEditing
cell type	marker genes (from the section "Transcriptional impact of BCL11A enhancer editing" and extended data figure 7 in original publication)
CD8a	CD8A, CD8B, CCL5
Treg	FOXP3, CTLA4
naive B cells	MS4A1
CD4	IL7R, CD4
NK	GNLY, NKG7
Mono	CD14, LYZ
Granulo	S100A8, S100A9, LYZ
CD8na	CD8B, CCR7
FCGR3A+ Mono	FCGR3A, MS4A7, CST3, CD4, BATF3
mDC	FCER1A, CD1C, CLEC10A, LYZ
Plasmablasts	CD38, TNFRSF17
pDC	TCF4, TNFRSF21, LYZ
