# Supplementary material for: cellMarkerPipe: Cell Marker Identification and Evaluation Pipeline in Single Cell Transcriptomes
Source: Research Square preprint supplement (doi:10.21203/rs.3.rs-3844718/v1), 2024-01-17
Supplement: Supplementary file 6 [file c7a3f42578eb97c53283ba04.xlsx]

## Sheet: All
Supplementary Table 7. Marker genes generated from different methods for the benchmark datasets
S7.1. PBMC-10k (input from 2500 cells and highly variable 5000 genes)
S7.2 Zeisel (top 10 combined)
S7.3 Jurkat (at 50:50 cell mixture ratio)
S7.4 Plant
S7.5 HumanGut (Colon, Rectum, Ileum samples)
S7.6 MiceGut (Ileum, Duodenum, Jejunum samples)
S7.7 GeneEditing (Unedited sample and Modified sample)

## Sheet: PBMC-10K
cell type	COSG	SC3	Seurat	SCMarker	scGeneFit	Comet
B	CD79A, CD79B, MS4A1, TCL1A, LINC00926, VPREB3, FCER2, BANK1, HLA-DQA2, BLK	CD74, HLA-DRA, CD79A, CD79B, HLA-DPA1, HLA-DPB1, HLA-DRB5, HLA-DQA1, HLA-DQA2, MS4A1	MS4A1, CD79B, CD79A, TCL1A, HVCN1, NCF1, IFT57, DUSP2, DUSP22, ISG15	CD79A, CD79B, MS4A1, HLA-DRA, TCL1A, HLA-DPA1, LINC00926, CD74, HLA-DQA1, HLA-DPB1	CD79A, LTB, RPS11, RP11-94L15.2, CHI3L2, NFKBIA, MT-CO3, RPLP1, MYC, RPL12	IFT57, EEF1B2, RPL29, HLA-DPA1, HLA-DRB1, HLA-DPA1, HLA-DPB1, HLA-DRB5, RPL36A
cd34	SOX4, SPINK2, PRSS57, RP11-620J15.3, CYTL1, C19ORF77, EGFL7, KIAA0125, CD34, GATA2	RPS24, ZFAS1, RPS23, RPL37A, RPL37, SOX4, RPL35A, UQCRB, SNHG7, SPINK2	RPS23, RPLP1, RPL35A, RPS24, RPS12, RPL34, RPS18, ACY3, RPS14, RPS27A	SOX4, SPINK2, PRSS57, RP11-620J15.3, CYTL1, C19ORF77, EGFL7, KIAA0125, CD34, GATA2	RPS23, RPL35A, RPL37A, RPLP1, RPL26, RPL37, RPL24, RPL38, RPS13, RPS15	HSD17B11, TPR, ATP5C1, IGLL1, AP001171.1, H1F0, RPL35A, ETS2, ICAM4, ACTB, RUVBL2, SF3B14, CLEC11A
cytotoxic_T	GZMK, CD8A, CD8B, ZNF683, CCL5, LAG3, RP11-291B21.2, TNFAIP3, CRTAM, PTGER4	RPL34, RPL36A, CD8A, GZMK, DUSP2, TNFAIP3, CITED2, PTGER4, GGA1, KLF13	CCL5, CD8B, RP11-291B21.2, CD8A, IL7R, CD69, LINC00936, SPG21, VDAC1, CCT6A	CD8B, CD8A, CCL5, RP11-291B21.2, GZMK, CD3D, MALAT1, CTSW, S100B, IL32	CD8B, CD8A, RP11-291B21.2, CD3D, LYAR, S100B, IL7R, DUSP2, TNFAIP3, RPL32	GNLY, MALAT1, IL7R, RPS14, RPS12, CD3D, RPL32, GZMA, CTSW, CD3D, MALAT1, NKG7, CST7
helper_T	TRAT1, CD40LG, GIMAP5, LDHB, AQP3, ITM2A, MYC, ADTRP, LTB, RPS4X	RPS4X, LDHB, GIMAP5, TRAT1, CD40LG, RGCC, MYC, SIRPG, FBLN5, GBP1	AQP3, GIMAP5, IL32, CRIP2, CLIC1, SLC25A5, PPIB, CRIP1, EIF4A1, ANXA5	CD3D, CD40LG, CD27, TRAT1, ACTB, AQP3, GIMAP5, LEF1, IL7R, MAL	LTB, CD40LG, TRAT1, CD27, GIMAP5, LEF1, CD3D, IL7R, CCR7, LDHB	TRAT1, ACTB, GIMAP5, AQP3, CD40LG, RPS28, RPL7, RPS21, RPL37A, LDHB
memory_T	RP11-403A21.2, CORO1B, IL32, TNFRSF4, CRIP1, IL7R, GPR183, RP11-119D9.1, S100A10, TNF	RPL36, CD3D, CRIP1, IL7R, CORO1B, DDIT4, FLNA, TNFRSF4, RP11-403A21.2, TNFRSF25	LTB, CD3D, IL32, IL7R, CORO1B, STMN1, ISG15, ZNF581, LDHA, HMGB2	IL32, S100A4, CD3D, IL7R, CORO1B, CRIP1, S100A10, RP11-403A21.2, AQP3, TNFRSF4	IL32, LTB, CD3D, IL7R, S100A4, CRIP1, CORO1B, RP11-403A21.2, S100A10, TNFRSF4	S100A4, S100A11, ANXA2, RPS18, RPL32, RPS15A, MAL, RPL31, RPS12, RPS27A, RPL36, LGALS1
monocytes	S100A9, S100A8, LYZ, CST3, FCN1, TYMP, CFD, CD14, TMEM176B, LGALS2	FTL, S100A9, S100A8, FTH1, CST3, TYROBP, S100A4, LYZ, HLA-DRB1, GPX1	CD74, LYZ, HLA-DRB5, HLA-DPB1, HLA-DRB1, HLA-DRA, GSTP1, HLA-DQA1, HLA-DPA1, XBP1	S100A9, S100A8, CST3, LYZ, FCN1, TYMP, CFD, TYROBP, CD14, TMEM176B	S100A4, LGALS1, S100A6, S100A11, LGALS3, KLF6, TIMP1, AHNAK, S100A10, C4ORF48	CAPG, GPX1, GSTP1, TYROBP, LY86, MALAT1, C4ORF48, NUP214, TKT, RPL5, CPVL, LGALS3, TMEM176A
naive_T	FHIT, RP11-664D1.1, ADTRP, LEF1, CCR7, CHI3L2, EPHX2, MAL, ACTN1, TCEA3	RPL5, RPL15, GNB2L1, CD27, HNRNPA1, LEF1, CCR7, MAL, FHIT, EPHX2	CCR7, MAL, FHIT, EPHX2, TRAT1, ATP5C1, SDF2L1, KDELR1, MANF, FKBP3	LEF1, CCR7, CD27, FHIT, MAL, CD3D, RP11-664D1.1, ADTRP, CD7, CD40LG	LEF1, CCR7, FHIT, CD27, ADTRP, CD40LG, CHI3L2, GIMAP5, ACTN1, CAMK4	RPL5, RPS4X, RPS13, MAL, RPL9, NPM1, RPL10A, RPL29, RPL7, RPL34, MAL, GIMAP5
naive_cytotoxic_T	CD8B, RP11-291B21.2, S100B, CARS, CPA5, CD8A, REG4, NELL2, RPS14, CA6	RPL32, CD8B, RPS12, RPL31, RPS14, RPS15A, RPS18, RPS15, RPS3A, RPL28	CD8B, RP11-291B21.2, CD8A, S100B, CARS, CPA5, CCR7, LEF1, CCT2, ATG3	CD8B, RP11-291B21.2, CD8A, S100B, CARS, CPA5, CD3D, NELL2, CD27, CCR7	CD8B, RP11-291B21.2, CD8A, S100B, CD3D, CCR7, CD27, RPL32, LEF1, LRRN3	RPL32, RPS12, RPL31, RPS14, S100B, RP11-291B21.2, CARS, CTSW, MALAT1
nature_killer	GNLY, GZMB, NKG7, CLIC3, FGFBP2, KLRB1, PRF1, KLRF1, CST7, GZMA	GNLY, NKG7, GZMA, CST7, GZMB, MALAT1, CLIC3, KLRB1, CTSW, FCER1G	NKG7, GNLY, IFITM2, HCST, GZMB, CCL4, GZMA, FGFBP2, CST7, CTSW	GNLY, NKG7, GZMB, CLIC3, CST7, GZMA, KLRB1, FGFBP2, PRF1, KLRF1	HCST, IFITM2, CD7, LYAR, ALOX5AP, CARD16, ACTB, ATP5E, MT-ATP6, MT2A	CTSW, PLAC8, IFITM3, PRSS23, SNORD3D, GPR56, CD7, CCL3, GNG2, AOAH, AKR1C3, KLRC1
regular_T	IL2RA, FOXP3, FANK1, RP11-1399P15.1, CTLA4, CCR10, NINJ2, TIGIT, IL32, PI16	IL32, JUNB, ACTB, VIM, AQP3, PLP2, SIT1, CRIP2, RP11-1399P15.1, GATA3	CRIP2, CORO1B, RGS1, JUND, LYRM4, TUBB4B, CITED2, SNX2, SSB, HMGB2	IL32, AQP3, RP11-1399P15.1, ACTB, CD3D, IL2RA, TIGIT, CCR10, CD27, VIM	IL32, CD27, CD3D, LTB, ACTB, CORO1B, TNFRSF4, RP11-403A21.2, LGALS3, TRAT1	IL32, AQP3, DUSP1, JUNB, CD27, TUBA1A, CD3D, RPL7, RPL31, CD27, RPS23, ANXA2, RPL32, IL32

## Sheet: Zeisel
cell type	COSG	SC3	Seurat	SCMarker	scGeneFit	Comet
Interneurons	GAD1, GAD2, SLC32A1, DLX6OS1, DLX1, PNOC, KCNIP1, HTR3A, VSTM2A, DLX1OS	GAD1, GAD2, NAP1L5, SLC6A1, SLC32A1, VSTM2A, TSPYL4, CPLX1, NRIP3, RAB3C	HTR3A, RELN, NPY, CNR1, CRH, VIP, KCTD12, CRHBP, CCK, SST	GAD1, GAD2, SLC32A1, DLX6OS1, DLX1, VSTM2A, PNOC, KCNIP1, HTR3A, ARL4C	GAD1, SLC32A1, NAP1L5, GAD2, VSTM2A, DLX1, ARL4C, SLC6A1, DNER, RBMS3	CPLX1, SLC6A1, TSPYL4, NRIP3, RBMS3, KCNC1, RAB3C, NDN, CAMK2N2, CACNG2
S1 Pyramidal	GM11549, CAR10, PCP4, TBR1, RAP1GAP2, MYL4, NECAB3, CCL27A-LOC1, HS3ST2, MEF2C	PCSK2, MEF2C, SNAP25, ARPP21, OSBPL1A, TAGLN3, ATP2B2, MDH1, NCALD, NRN1	OSBPL1A, PCP4, SNAP25, CAMK2N1, NRGN, RORB, TMSB10, NDN, CTGF, NR4A2	GM11549, MEF2C, CAR10, PCP4, CCL27A-LOC1, TBR1, PCSK2, RAP1GAP2, NECAB3, MYL4	PCSK2, OSBPL1A, SLC1A2, PLN, TPM1, HPGD, TSPYL4, RSPH1, MYLK, FAM183B	MEF2C, CHN1, NRN1, SH3GL2, CCL27A-LOC1, IGFBP6, SV2B, MDH1, OSBPL1A, TUBA4A
CA1 Pyramidal	CRYM, CPNE6, WIPF3, SPINK8, ST6GALNAC5, GABRA5, NEUROD6, FIBCD1, LPL, IQGAP2	CPNE6, GRIA1, TSPAN13, PPP3CA, CAMKV, NEUROD6, CRYM, GRM5, FAM131A, HPCA	ATP2B1, HPCA, PPP3CA, GRIA2, CRYM, TSPAN13, NNAT, SNHG11, MEG3, SCG2	CRYM, CPNE6, NEUROD6, WIPF3, ST6GALNAC5, GABRA5, SPINK8, ITPKA, DGKG, 2010300C02RIK	GRIA1, CHL1, TPM1, PCSK2, TSPYL4, RAB3C, RSPH1, KRT15, LRRC23, LST1	RAB3A, NCALD, MEF2C, RCAN2, PCSK2, ATP2B1, ARHGAP12, CNIH2, FAM19A1, GABRA2
Oligodendrocytes	MOG, MOBP, UGT8A, ERMN, TMEM88B, MAG, MBP, CNP, CLDN11, PDLIM2	PLP1, MBP, UGT8A, CNP, MOG, MOBP, SEPT4, ENPP2, MAG, TSPAN2	MAG, TRF, APOD, MAL, OPALIN, MBP, PTGDS, GSTP1, MARCKS, 9630013A20RIK	MOG, MOBP, UGT8A, ERMN, CNP, MAG, MBP, TMEM88B, CLDN11, GSN	SEPT4, CMTM5, CSRP1, EMR1, PF4, MLF1, RNASE4, CBR2, MRC1, LYZ2	PLP1, MYO1D, PRDX6, CDC42EP2, CD9, DLGAP1, HADH, LGI3, TPPP3, CD63
Microglia	C1QA, C1QB, FCGR3, TYROBP, FCRLS, C1QC, FCER1G, CSF1R, LAPTM5, F13A1	CSF1R, CTSS, C1QA, C1QB, TYROBP, B2M, FCRLS, LAPTM5, RNASE4, FCGR3	C1QB, FCGR3, LYZ2, CCL3, TNF, CCRL2, APOE, CST3, NFKBIA, RGS2	C1QA, C1QB, FCGR3, TYROBP, FCRLS, C1QC, FCER1G, CSF1R, LAPTM5, F13A1	TYROBP, C1QA, C1QB, MRC1, FCRLS, FCGR3, CSF1R, C1QC, RNASE4, CBR2	CTSS, F13A1, C1QA, ZFP36, B2M, RNASE4, CD68, FCGR1, FCRLS, CSF1R
Endothelial	CLDN5, FLT1, LY6C1, ITM2A, GPR116, ELTD1, PTPRB, SLCO1A4, CTLA2A, ABCB1A	ITM2A, SPARC, BSG, CLDN5, LY6C1, ESAM, PTPRB, PLTP, MYL12A, FLT1	CTLA2A, CD93, SLC7A5, MYL12A, COL4A1, COL4A2, ANXA1, THBD, ATP13A5, APLN	CLDN5, FLT1, LY6C1, ITM2A, GPR116, ELTD1, PTPRB, SLCO1A4, ABCB1A, CTLA2A	ACKR3, PTRF, S100A11, VIM, ASPN, GJA4, HIGD1B, MYL9, CRIP1, DAB2	SPARC, VWA1, GPR116, SGMS1, ABLIM1, ESAM, SLC22A8, ABCB1A, ITM2A, MYL12A
Astrocytes	ACSBG1, CLDN10, AQP4, NTSR2, LCAT, ALDOC, FABP7, GJA1, FGFR3, SLC4A4	SLC1A2, ATP1A2, SLC1A3, CLU, GJA1, SPARCL1, GPR37L1, MT1, AQP4, PRDX6	AQP4, SLC1A3, GFAP, ATP1A2, SLC1A2, MT1, PRDX6, SPARCL1, NCAN, CPE	AQP4, ACSBG1, CLDN10, NTSR2, LCAT, ALDOC, GJA1, FABP7, GPR37L1, PLA2G7	ATP1A2, SLC1A3, ACSBG1, ALDOC, CLDN10, NTSR2, NDRG2, SLC1A2, APOE, RARRES2	SPARCL1, GPR37L1, MT2, SLC4A4, FABP7, MMD2, APOE, CST3, NDRG2, PLA2G7
Ependymal	1700001C02RIK, DYNLRB2, FAM216B, TMEM212, 1700009P17RIK, CCDC153, LBP, MLF1, GM10714, DNALI1	SOX9, LBP, MIA, TMEM47, FOS, DYNLRB2, MLF1, CYR61, JUN, PBXIP1	TMEM212, FAM183B, UCMA, PLA2G7, IGFBP2, ANXA5, DBI, BTG2, IGF2, MAOB	DYNLRB2, LBP, MLF1, TMEM212, FAM216B, CALML4, 1700009P17RIK, FAM183B, CCDC153, 1110017D15RIK	DYNLRB2, KRT15, MLF1, 1700001C02RIK, MNS1, TMEM212, FAM216B, 1110017D15RIK, CCDC153, LRRC23	KRT15, LBP, ENKUR, DYNLRB2, FAM183B, MNS1, TMEM212, CCDC153, 1700094D03RIK, MLF1
Mural	TAGLN, TPM2, ACTA2, MUSTN1, MYH11, PLN, MYL9, CRIP1, MYLK, OLFR78	TAGLN, ACTA2, MYL9, CRIP1, TPM2, TPM1, MYH11, MGP, HIGD1B, VIM	ACTA2, MYH11, TAGLN, TPM2, MYL9, MGP, CRISPLD2, TPM1, GM13889, ATF5	TAGLN, ACTA2, TPM2, MUSTN1, MYH11, MYL9, CRIP1, PLN, HIGD1B, ASPN	MYL9, MUSTN1, CRIP1, ACTA2, TAGLN, TPM2, MYH11, MYLK, HIGD1B, PTRF	MGP, PLN, SNCG, CALD1, OLFR78, HIGD1B, LAMA5, MYH11, ZFHX3, ACTA2

## Sheet: Jurkat
cell type	COSG	SC3	Seurat	SCMarker	scGeneFit	Comet
293T	RPS2, GNB2L1, CKB, XIST, CDKN2A, PRELID1, TPI1, NT5C3B, RPL29, CA2	RPS2, GNB2L1, TPI1, PRELID1, SLC25A6, NT5C3B, CKB, SERBP1, RPL29, EEF2	XIST, CKB, CA2, GNB2L1, PRELID1, CHCHD10, ACTG1, RPL29, RPS4X, RPL12	GNB2L1, CKB, XIST, CDKN2A, PRELID1, TPI1, NT5C3B, CA2, SLC25A6, GAL	RPS21, MT-ATP6, MT-ND2, CD3D, SNORA76, IGFBP2, RPL37A, RPL38, NDUFA3, NDUFB1	RPL37, RPS27L, HMGN2, HMGN5, PSMA3, CANX, PPDPF, MGMT, RPS27, RPL38
Jurkat	RPS27, RPS29, RPL37, RPL38, ATP5I, MT-ND3, RPL37A, RPS21, NDUFB1, ALYREF	RPS27, RPS29, RPL38, RPL37, ATP5I, MT-ND3, RPL37A, RPS21, NDUFB1, RPL34	RPS27, RPL34, RPL37A, MT-ATP6, TMSB4X, RPL37, MT-ND2, MT-CO2, RPS27A, HIST1H4C	NDUFB1, ALYREF, EIF3J, NDUFA3, ATP5E, ATP5J2, SON, COX7C, SNORA76, SOX4	ALYREF, MT-ND3, RPS29, RPS27, EIF3J, RPL37, TMSB4X, ATP5I, AIF1, CD3E	RPL22L1, ATP5E, ZMPSTE24, TAX1BP1, WBP5, H2AFV, MT-ND3, CDC27, RPS2, CDC6

## Sheet: Plant
cell type	COSG	SC3	Seurat	SCMarker	scGeneFit	Comet
Atrichoblast	AT1G28290, AT2G23410, AT3G49190, AT5G58784, AT1G54010, AT1G54000, AT3G06460, AT1G36060, AT1G33750, AT2G43610	AT4G30280, AT4G12545, AT1G65310, AT1G70850, AT2G37130, AT5G64100, AT3G29250, AT1G53830, AT3G01190, AT4G12550	AT1G28290, AT2G43610, AT3G49190, AT3G16440, AT4G15910, AT1G06090, AT1G47600, AT1G51470, AT2G30860, AT1G07790	AT1G28290, AT2G43610, AT3G49190, AT5G10130, AT1G54010, AT1G54000, AT5G24070, AT1G36060, AT5G60530, AT3G03500	AT1G52070, AT1G25275, AT2G21610, AT3G29250, AT3G24670, AT5G40510, AT1G23750, AT1G70850, AT1G35670, AT4G22212	AT5G47700, AT5G40730, AT1G75750, AT5G40450, AT4G18730, AT5G46900, AT5G64260, AT2G43535, AT3G56240, AT2G43610
Columella	AT1G50060, AT1G05010, AT1G22880, AT2G21610, AT4G27400, AT4G15530, AT1G71140, AT4G23920, AT3G19430, AT5G20230	AT1G25275, AT2G36950, AT1G03220, AT1G52070, AT5G55110, AT5G60530, AT5G54370, AT1G52050, AT4G17940, AT1G15385	AT1G50060, AT1G52070, AT5G54370, AT5G60530, AT5G55110, AT1G52050, AT4G27400, AT3G19430, AT1G05010, AT4G26880	AT1G50060, AT1G05010, AT1G22880, AT2G21610, AT4G27400, AT3G19430, AT5G55110, AT1G25275, AT5G20230, AT5G54370	AT1G25275, AT2G21610, AT1G52070, AT2G46140, AT2G47650, AT1G35670, AT3G24670, AT1G70850, AT5G05500, AT1G62980	AT1G15385, AT1G22880, AT1G50060, AT1G25275, AT4G17940, AT3G22910, AT2G21610, AT1G52050, AT5G20230, AT5G54370
Cortex	AT1G13930, AT5G42250, AT3G44310, AT2G45180, AT1G12090, AT1G62510, AT1G58360, AT5G57785, AT3G26300, AT2G23910	AT1G21310, AT1G13930, AT2G43150, AT4G30170, AT5G42250, AT3G44310, AT5G40450, AT1G12090, AT3G51240, AT1G13420	AT2G34420, AT1G79040, AT1G21310, AT2G43150, AT1G08380, AT5G66570, AT3G47470, AT1G61520, AT5G02380, AT4G24380	AT1G13930, AT5G42250, AT1G21310, AT1G12090, AT3G44310, AT2G45180, AT3G51240, AT4G30170, AT1G62510, AT4G22460	AT5G42250, AT1G13930, AT1G21310, AT3G44310, AT3G51240, AT4G22460, AT1G12090, AT5G13930, AT5G24410, AT1G13420	AT1G29025, AT2G37040, AT1G51680, AT2G25810, AT3G19450, AT3G13610, AT5G40450, AT4G01150, AT4G23400, AT1G13420
Cortex/Trichoblast	AT1G65310, AT4G12545, AT1G06120, AT4G33790, AT4G15290, AT1G19900, AT2G37130, AT1G14960, AT1G70850, AT2G43590	AT1G62480, AT1G12080, AT4G11210, AT3G14990, AT2G02130, AT4G22212, AT4G14130, AT5G56540, AT2G13820, AT4G26320	AT4G12545, AT5G64100, AT2G43820, AT4G19030, AT4G37390, AT5G52310, AT1G05340, AT3G50970, AT5G42380, AT1G03220, AT3G28210	AT1G65310, AT4G12545, AT1G06120, AT4G12550, AT1G14960, AT4G15290, AT2G37130, AT1G70850, AT4G33790, AT5G64100	AT1G65310, AT1G70850, AT3G29250, AT4G22666, AT5G17820, AT3G28550, AT1G23720, AT2G21045, AT1G65610, AT2G46140	AT2G39040, AT4G23400, AT1G78000, AT4G22666, AT1G12110, AT5G48010, AT1G23720, AT5G56540, AT5G48000, AT3G14850
Endodermis	AT3G22620, AT3G22600, AT3G32980, AT2G32300, AT1G05260, AT5G15290, AT2G14900, AT2G28670, AT1G61590, AT4G11290	AT1G28290, AT4G19030, AT1G54000, AT1G36060, AT1G54010, AT3G49190, AT3G10720, AT3G60245, AT2G40205, AT4G27090	AT2G36100, AT2G28670, AT3G22620, AT5G66390, AT3G22600, AT3G24020, AT3G11550, AT1G75750, AT3G55230, AT3G05500	AT3G22620, AT3G22600, AT3G32980, AT2G32300, AT1G05260, AT5G15290, AT2G14900, AT2G28670, AT1G61590, AT4G11290	AT3G22620, AT3G32980, AT3G22600, AT2G14900, AT1G05260, AT3G56240, AT2G32300, AT4G11290, AT3G19450, AT5G20280	AT1G28200, AT3G56240, AT1G72430, AT3G15518, AT3G22600, AT1G75750, AT2G40113, AT2G40160, AT2G30210, AT2G34590
Stele	AT1G12080, AT2G02130, AT4G14130, AT4G11210, AT4G22212, AT2G13820, AT3G59370, AT2G45470, AT4G18510, AT2G31900	AT3G22600, AT3G22620, AT3G56240, AT2G32300, AT3G32980, AT1G05260, AT2G14900, AT2G28670, AT5G15290, AT4G11290	AT1G62480, AT1G12080, AT4G11210, AT3G59370, AT2G02130, AT1G02500, AT4G39700, AT1G20850, AT2G46680, AT1G68720	AT1G12080, AT4G11210, AT2G02130, AT4G14130, AT4G22212, AT2G13820, AT3G59370, AT2G45470, AT4G18510, AT1G71880	AT4G22212, AT3G19450, AT3G51240, AT5G13930, AT3G56240, AT1G13930, AT3G61560, AT2G45890, AT3G07880, AT5G20280	AT4G26320, AT5G60390, AT1G62480, AT2G31900, AT3G14990, AT3G59370, AT1G71880, AT2G44300, AT4G18510, AT4G11210
Trichoblast	AT3G54580, AT3G09925, AT1G30870, AT3G54590, AT1G01750, AT5G05500, AT4G00680, AT4G40090, AT3G62680, AT1G12560	AT4G01480, AT3G54580, AT1G58270, AT5G14330, AT5G44020, AT3G28550, AT3G09925, AT1G01750, AT5G17820, AT3G54590	AT3G62680, AT4G40090, AT5G14330, AT1G58270, AT3G54580, AT1G66270, AT5G35190, AT1G54970, AT4G02270, AT1G07610	AT3G54580, AT3G09925, AT1G30870, AT3G54590, AT1G01750, AT5G05500, AT4G40090, AT4G00680, AT3G62680, AT1G12560	AT4G01480, AT2G01540, AT3G09925, AT3G21180, AT1G01750, AT5G58010, AT1G30870, AT5G14330, AT3G23190, AT2G41970	AT1G23720, AT5G46870, AT5G49270, AT1G66270, AT2G29750, AT5G65160, AT5G40860, AT5G57530, AT5G42510, AT5G61550

## Sheet: HumanGut
Colon Sample
cell type	COSG	SC3	Seurat	SCMarker	scGeneFit	Comet
Enteriendocrine	SCGN, INSM1, MIR7-3HG, NLRP1, UCN3, SCG3, NEUROD1, PRPH, FEV, RP11-343J3.2	CA7, FKBP1A, SPIB, CA4, BEST4, DMBT1, TMEM176B, TMEM176A, CEACAM6, CTSE	NEUROD1, CHGB, GCG, PCSK1N, TUBA1A, CHGA, CES1, TPH1, PYY, SST	SCGN, INSM1, PCSK1N, CRYBA2, CACNA1A, MIR7-3HG, TUBA1A, CPE, FEV, CHGA	INSM1, SCGN, CPE, PCSK1N, CACNA1A, MIR7-3HG, MDK, PLEKHB1, LYPD8, ASCL2	SLC29A4, NKX2-2, ETV1, CPE, KIF5C, NLRP1, SCG5, AMIGO2, PAM, PRPH, CACNA1A
Enterocyte	SLC26A3, MS4A12, SLC51B, TMIGD1, SLC26A2, GCNT3, CEACAM7, CDHR5, SEPP1, HHLA2	PCSK1N, SCGN, INSM1, BTG2, CPE, MDK, CHGA, TUBA1A, PAM, MS4A8	SLC26A3, CEACAM7, CEACAM1, SEPP1, AQP8, CLCA4, IL32, FTH1, FXYD3, IFI27	SLC26A3, CEACAM7, MS4A12, SLC51B, CDHR5, CEACAM1, GCNT3, SEPP1, TMIGD1, FABP1	KRT20, CEACAM6, SDCBP2, TDP2, LYPD8, HRCT1, HIGD1A, IL18, HSPB1, CHP2	RPL5, AGR2, RPL15, RPS7, RPS3A, RPS10, AGR2, RPL7, RPS17, RPL26, RPS6, RPL6
Goblet	TFF3, CLCA1, FCGBP, SERPINA1, KLK1, LRRC26, SPINK4, ITLN1, REP15, TPSG1	SLC26A2, FABP1, PHGR1, CDHR5, C19ORF33, SLC26A3, TMEM54, CA2, MALL, NEAT1	TFF3, FCGBP, ITLN1, CLCA1, REP15, SPINK4, REG4, GSN, AGR2, TFF1	TFF3, FCGBP, KLK1, CLCA1, LRRC26, SPINK4, ITLN1, REP15, TPSG1, RNASE1	TFF3, FCGBP, CLCA1, KLK1, SERPINA1, LRRC26, TPSG1, REP15, RNASE1, BEST2	NPDC1, ADH1C, TFF3, CREB3L1, HPCAL1, SPINK1, FTH1, TSPAN8, PA2G4, TFF3, GOLM1, ADH1C, ADIRF, CD24
Paneth.like	CA7, BEST4, SPIB, CTSE, OTOP2, DMBT1, NBPF19, MSLN, UNC5C, MEIS1	TFF3, FCGBP, KLK1, SERPINA1, SPINK4, LRRC26, CLCA1, RNASE1, ITLN1, ST6GALNAC1	SPIB, BEST4, CA7, CA4, GUCA2A, S100P, MT2A, AREG, MT1H, HIST1H4C	CA7, BEST4, SPIB, CTSE, CA4, OTOP2, NBPF19, MSLN, UNC5C, HES4	BEST4, CA7, SPIB, CTSE, CA4, NBPF19, FKBP1A, HRCT1, MEIS1, OTOP2	S100A10, NEURL1, HEPACAM2, NBPF14, NBPF19, TMEM176B, TMEM176A, MSLN, NEURL1, FTL, CA4, KRT20, LYZ
Progenitor	ADH1C, TXN, PEBP1, EBPL, MGST1, C1QBP, CYC1, TKT, LCN2, TUFM	ADH1C, TXN, RPL6, PEBP1, EBPL, LGALS2, SUCLG1, TKT, LCN2, ATP5B	RPS27A, RPS2, RPS3, RPS19, RPL13, RPS14, RPS4X, RPL34, RPS12, PIGR	ADH1C, EBPL, MLEC, TKT, SUCLG1, PYCARD, ESD, IMPDH2, LGALS2, HSPD1	FTL, CYSTM1, S100A10, CHP2, ALDH1B1, SLPI, C1ORF21, TMEM176B, TMEM176A, ID1	RPS13, RPL7, RPS17, RPS27A, EEF1A1, RPL10A, RPS10, HEPACAM2, TFF3
Stem.Cell	SMOC2, ASCL2, LGR5, RGMB, DPEP1, CYP4X1, CPXM2, EPHB3, TMPRSS13, CAPN6	H2AFZ, HMGB2, STMN1, TUBA1B, TUBB, HMGB1, HMGN2, PTMA, TK1, CENPW	SMOC2, ASCL2, RGMB, ALDH1B1, MARCKSL1, RPS4Y1, C6ORF48, TSPAN8, SNHG7, HES1	SMOC2, ASCL2, LGR5, RGMB, DPEP1, ALDH1B1, EPHB3, CDCA7, PLEKHB1, PHLDA1	ASCL2, SMOC2, RGMB, LGR5, ALDH1B1, PLEKHB1, PROX1, KLK1, CPE, FTL	ASCL2, PNRC1, CYP2W1, BASP1, LEFTY1, TSPAN8, ASCL2, CPXM2, SOX9, FAM3B, RGMB, PRSS23, SLCO4A1-AS1
TA	HMGB2, TK1, RRM2, KIAA0101, UBE2C, BIRC5, STMN1, TOP2A, MKI67, TYMS	ASCL2, RGMB, SMOC2, PRDX5, RPL36A, RPL37, SLC12A2, CDCA7, ALDH1B1, RPL12	UBE2C, HMGB2, KPNA2, FABP5, TUBB4B, ARL6IP1, SPINK1, PTGR1, MT1E, GSTA1	HMGB2, TK1, RRM2, KIAA0101, STMN1, UBE2C, BIRC5, TYMS, MKI67, TOP2A	H2AFZ, HMGB2, KIAA0101, GMNN, CRIP1, HES4, FKBP1A, ALDH1B1, MDK, RGMB	STMN1, HMGB1, RRM2, NUSAP1, CCNA2, UBE2C, PBK, TOP2A, CDK1, BIRC5, SMC4
Rectum Sample
cell type	COSG	SC3	Seurat	SCMarker	scGeneFit	Comet
Enteriendocrine	SCGN, FEV, INSM1, CPE, CRYBA2, SCG5, SCG2, CACNA1A, NEUROD1, CHGA	SPIB, CA7, FKBP1A, NBPF14, CTSE, HES4, BEST4, CA4, HSPB1, GNPTAB	CHGB, PCSK1N, TPH1, CHGA, VIM, GCG, INSL5, LCN15, PYY, REG4	SCGN, FEV, CPE, INSM1, PCSK1N, SCG5, CRYBA2, TUBA1A, CACNA1A, SCG2	PCSK1N, SCGN, CPE, FEV, CACNA1A, SCG5, INSM1, MS4A8, TUBA1A, CADPS	PCSK1N, RAB3B, PCSK1, QPCT, TTR, UCP2, GNG2, PCSK1N, NKX2-2, UCN3, PYY, SCG3
Enterocyte	MS4A12, SLC26A3, TMIGD1, CEACAM7, MALL, SLC51B, ATP1B3, PLAC8, SEPP1, HHLA2	SCGN, CPE, PCSK1N, MS4A8, TUBA1A, CRYBA2, INSM1, FEV, SCG5, MDK	AQP8, SEPP1, SLC26A2, CA1, FTH1, CKB, CD74, KRT19, KRT8, CCL20	MS4A12, SLC26A3, CEACAM7, TMIGD1, MALL, PLAC8, SEPP1, ATP1B3, SLC51B, CDKN2B-AS1	SLC26A3, MS4A12, CEACAM7, PLAC8, MALL, TMIGD1, ATP1B3, CDKN2B-AS1, FABP1, CDHR5	SLC51B, C2ORF88, FTH1, CA2, RPS12, RPS27, RPL37, RPS8, RPL37A, RPL31, RPL11
Goblet	TFF3, SERPINA1, FCGBP, ITLN1, REP15, LRRC26, KLK1, ATOH1, ST6GALNAC1, CLCA1	FABP1, SLC26A3, MS4A12, ATP1B3, PLAC8, MALL, PHGR1, MUC12, CEACAM7, SEPP1	TFF3, FCGBP, ITLN1, CLCA1, SPINK4, WFDC2, AGR2, SOX4, PTMA, RPL21	TFF3, FCGBP, KLK1, ITLN1, REP15, ST6GALNAC1, ATOH1, CLCA1, FRZB, ZG16	TFF3, KLK1, SERPINA1, FCGBP, REP15, LRRC26, ITLN1, ST6GALNAC1, SLC12A2, NEURL1	SLC12A2, AGR2, TFF3, HEPACAM2, ATOH1, HEPACAM2, MRPL11, TMEM45B, FTH1, GPI, CD99, IMPA2, ZG16
Paneth.like	CA7, SPIB, BEST4, OTOP2, NBPF14, DMBT1, CTSE, HES4, NBPF19, UNC5C	TFF3, KLK1, FCGBP, SERPINA1, ST6GALNAC1, ITLN1, LRRC26, REP15, HEPACAM2, AGR2	CA7, FKBP1A, CA4, ID1, GUCA2A, SRI, TP53INP2, GUCA2B, MT1G, MT1H	CA7, SPIB, BEST4, NBPF14, OTOP2, DMBT1, HES4, CTSE, NBPF19, UNC5C	CA7, SPIB, BEST4, NBPF14, CTSE, FKBP1A, OTOP2, DMBT1, HES4, NBPF19	HES4, NEURL1, CDK18, GNPTAB, OTOP2, CA4, DMBT1, HSPB1, NBPF19, GNPTAB, MSLN
Progenitor	B3GNT7, LCN2, PLA2G2A, ADH1C, CD24, CFTR, LGALS2, MUC4, TXN, NXPE4	B3GNT7, LCN2, ADH1C, PLA2G2A, LGALS2, CD24, PIGR, TXN, SLPI, SELENBP1	LCN2, B3GNT7, LGALS2, TXN, MT1X, MT1E, NTRK2, EIF5A, CXCL3, NEAT1	B3GNT7, LCN2, ADH1C, PLA2G2A, PIGR, CD24, CFTR, SLPI, SELENBP1, CYC1	GNPTAB, HSPB1, MUC12, GNG2, MIR7-3HG, NLRP1, NKX2-2, CADPS, CACNA1A, NOTCH2	MDK, LGALS2, LCN2, GUCA2A, CES2, HEPACAM2, CEACAM5, KRT20, LRRC26, KLK1, TFF3, FCGBP, KRT20, MDK
Stem.Cell	ASCL2, SMOC2, LGR5, RGMB, ALDH1B1, ETS2, CYP2W1, FXYD5, CDCA7, TMPRSS13	H2AFZ, HMGB2, TUBA1B, STMN1, TUBB, HMGN2, HMGB1, PTMA, KIAA0101, TK1	RPL12, RPL13, RPS4X, RPL3, RPS3, RPS6, RPL29, RPL32, RPS2, RPL10	ASCL2, SMOC2, RGMB, LGR5, CDCA7, CYP2W1, ALDH1B1, ETS2, OLFM4, PTPRO	ASCL2, RGMB, ETS2, CYP2W1, SLC12A2, KLK1, TUBA1A, GMNN, TUBB, H2AFZ	LEFTY1, ASCL2, RGMB, RPS18, EIF3E, ALDH1B1, ASCL2, LGR5, SMOC2, NACA, TSPAN8, EEF2
TA	TOP2A, BIRC5, UBE2C, KIAA0101, RRM2, TK1, CDK1, NUSAP1, TYMS, HMGB2	RPS18, ASCL2, RPS3, RPS6, RPL13, RPS4X, RPL3, RPL12, RGMB, RPS5	UBE2C, H2AFZ, TUBA1B, HMGN2, HIST1H4C, TUBB4B, OLFM4, ARL6IP1, HES1, LYZ	TOP2A, KIAA0101, BIRC5, UBE2C, RRM2, TK1, CDK1, TYMS, NUSAP1, HMGB2	H2AFZ, TUBA1B, HMGB2, TUBB, TYMS, KIAA0101, GMNN, HES4, ETS2, SLC12A2	RRM2, TUBA1B, CDK1, HMGN2, CCNA2, HMGB1, PBK, PRC1, TUBA1B, NUSAP1, BIRC5, PRC1, UBE2C
Ileum Sample
cell type	COSG	SC3	Seurat	SCMarker	scGeneFit	Comet
Enteriendocrine	NEUROD1, SCGN, SCG5, FEV, KCTD12, PAX6, CRYBA2, CHGA, VWA5B2, TTR	SPIB, HSPB1, CA7, BEST4, GMNN, CA4, CD24, NBPF19, SEPW1, CYBA	TTR, CHGB, PCSK1N, CCK, CHGA, GCG, LCN15, REG4, NTS, PYY	PCSK1N, NEUROD1, SCGN, SCG5, CHGA, FEV, CRYBA2, CHGB, KCTD12, TTR	PCSK1N, NEUROD1, SCGN, SCG5, VWA5B2, INSM1, PAX6, FEV, SLC29A4, REG4	PCSK1N, CRYBA2, VWA5B2, PCSK1, FEV, TTR, PCSK1N, SCT, CHGB, UCN3, KCTD12, INSM1
Enterocyte	SEPP1, SERPINA1, APOB, GUCA2A, FABP2, RBP2, CYP3A4, CRIP1, SLC7A9, FLJ22763	PCSK1N, NEUROD1, SCGN, CHGA, SCT, H3F3B, CRYBA2, SCG5, FEV, CPE	APOA1, RBP2, SEPP1, SERPINA1, FABP2, APOA4, APOC3, LDHA, GSTA1, SLC25A5	GUCA2A, APOB, CYP3A4, FLJ22763, SLC7A9, APOC3, CDKN2B-AS1, APOA4, TMIGD1, MGAM	GUCA2A, GUCA2B, PAX6, FEV, VWA5B2, SLC29A4, SCGN, INSM1, MEIS1, SCG5	RBP2, RPS3, AK3, ATP8B1, CBWD1, FAM120A, DSTN, GOLM1, KANK1, HNRNPK, NANS, TPGS2
Goblet	CLCA1, TFF3, SPINK4, REP15, FCGBP, ITLN1, ATOH1, LRRC26, BCAS1, SPDEF	SEPP1, SERPINA1, FABP2, APOB, RBP2, CRIP1, CYP3A4, APOC3, APOA1, FLJ22763	ITLN1, CLCA1, FCGBP, SPINK4, TFF3, RNASE1, SLC12A2, ZG16, RP11-462G2.1, HSP90AA1	TFF3, CLCA1, SPINK4, REP15, FCGBP, ITLN1, REG4, LRRC26, ATOH1, BCAS1	TFF3, CLCA1, FCGBP, LRRC26, REP15, SPINK4, BCAS1, SPDEF, ATOH1, ST6GALNAC1	LRRC26, NPDC1, SPDEF, ITLN1, REP15, HEPACAM2, CREB3L1, REP15, HEPACAM2, ST6GALNAC1, KLK1, CREB3L1, TPSG1, RAB27A
Paneth.like	SPIB, BEST4, CA7, CA4, OTOP2, HES4, RHOV, NBPF19, MEIS1, MSLN	TFF3, SPINK4, FCGBP, CLCA1, REG4, LRRC26, ST6GALNAC1, REP15, AGR2, HEPACAM2	CA7, CA4, BEST4, OTOP2, SPIB, LYZ, CPA2, GUCA2A, CKB, GUCA2B	SPIB, CA7, BEST4, CA4, OTOP2, HES4, NBPF19, PROX1, RHOV, HSPB1	SPIB, BEST4, CA7, HSPB1, CA4, HES4, NBPF19, GUCA2B, OTOP2, PROX1	NBPF19, NBPF14, RHOV, PROX1, PDLIM4, LYZ, IFITM2, SEPW1, NBPF19, ADGRG4, HEPACAM2
Progenitor	ADH1C, KCNJ13, TXN, SLC25A6, SNHG19, PIGR, RPS29, DMBT1, CASP1, REG1A	SLC25A6, TXN, KCNJ13, ATP5G3, ANXA2, CASP1, ATP5A1, TSPO, ATP5B, ETHE1	DMBT1, ANXA2, SRSF2, MT1H, LCN2, GSTA2, HLA-B, AKR1B10, REG1B, PI3	ADH1C, PPP1R1B, OLFM4, DMBT1, EEF1A1, GPX2, C1QBP, PIGR, MGST1, HNRNPA1	RNASE1, IFITM2, CREB3L1, H2AFZ, NBPF14, ST6GALNAC1, DTYMK, NBPF19, GMNN, NOTCH2	ADH1C, RPL32, RPS8, RPL5, RPL10A, RPLP1, ADH1C, RPS6, RPS29, RPS3, RPLP2, RPS28
Stem.Cell	SMOC2, LGR5, RGMB, RP11-419J16.1, ASCL2, PHLDA1, ALDH1B1, TM4SF1, GDPD5, CERS4	HMGB2, H2AFZ, PTMA, STMN1, HMGN2, HMGB1, TUBA1B, KIAA0101, TUBB, IDH2	SMOC2, RNF186, MYC, RNF43, MLXIP, GDF15, EDN1, EGR2, PMAIP1, MT1F	SMOC2, LGR5, RGMB, ASCL2, ALDH1B1, RP11-419J16.1, CDCA7, OLFM4, MARCKSL1, SLC12A2	LGR5, SMOC2, PDLIM4, PROX1, GMNN, QSOX1, NPDC1, IFITM2, CEACAM5, CREB3L1	RGMB, RPL34, ALDH1B1, SOX4, RPL31, RPS12, SPINK1, LGR5, ALDH1B1, RPL13A, RPL12, ARID5B, RPL13
TA	TK1, TOP2A, KIAA0101, MKI67, UBE2C, BIRC5, RRM2, CDK1, NUSAP1, CCNA2	RPS9, RPS12, RPS18, OLFM4, RPL13A, RPL13, RPL12, RPL31, RPS3, RPL34	RPLP1, RPS2, RPS3, RPS6, RPS12, RPL13, RPL13A, RPL34, RPS4X, RPS14, RPL10	TK1, KIAA0101, TOP2A, STMN1, HMGB2, MKI67, UBE2C, BIRC5, RRM2, CDK1	H2AFZ, HMGB2, KIAA0101, TUBA1B, STMN1, TK1, TUBB, CENPW, ZWINT, DTYMK	CDK1, HMGB1, RRM2, CCNA2, TUBA1B, PTMA, MAD2L1, TUBB, PBK, HMGB1, UBE2C, CDK1, NUSAP1

## Sheet: MiceGut
Ileum Sample
cell type	COSG	SC3	Seurat	SCMarker	scGeneFit	Comet
EP	DMBT1, RBP7, CDC20, GJB3, PLK1, BIRC5, CCNB2, CDKN3, LMNA, CDK1	CLCA3B, IFITM3, BEX1, HMGN1, AMICA1, KCNE3, SLC12A2, TUBB5, ASCL2, ZFOS1	DMBT1, RBP7, CDC20, RANBP1, CCNB2, KLF5, CCND2, RFC4, ID1, HIST1H2BC	DMBT1, RBP7, BIRC5, CDC20, HMGB2, SFN, CDK1, FGFBP1, GJB3, 2810417H13RIK	DMBT1, RBP7, KCNN4, RANBP1, GSR, SFN, GJB3, CCND2, KRT19, NHP2	PLK1, KRT19, AURKA, UBE2C, PBK, RACGAP1, CDKN3, ASF1B, CCNA2, CCNB1
Enterocyte	SLC51A, FABP6, SLC51B, DPEP1, MEP1B, ST3GAL4, CNDP2, ANPEP, SULT2B1, ENPEP	CHGB, GFRA3, CHGA, SEPP1, SLC25A4, FAM183B, SCT, APLP1, PCSK1N, NGFRAP1	FABP6, ANPEP, REG3B, PHGR1, CRIP1, REG3G, KRT19, APOA1, LYPD8, FABP2	SLC51A, FABP6, ST3GAL4, SLC51B, DPEP1, MEP1B, CES2E, CNDP2, ANPEP, ENPEP	ST3GAL4, PHGR1, CRIP1, PRAP1, KRT19, MUC3, ABHD11OS, MAOA, MT1, CISD3	2200002D01RIK, DPEP1, CCL25, KRT20, CLEC2H, CYP4F14, NAALADL1, MEP1B, CNDP2, MYL12B
Enteroendocrine	GFRA3, CHGB, PCSK1N, CPE, RESP18, FEV, INSM1, CCK, VWA5B2, NEUROD1	CD24A, RGS13, LTC4S, LRMP, MGST3, SH2D6, AVIL, ALOX5AP, KRT18, ESPN	CHGB, CCK, CHGA, IAPP, PYY, GHRL, TAC1, GCG, SCT, GIP	GFRA3, CHGB, PCSK1N, CPE, FEV, RESP18, CHGA, INSM1, CCK, VWA5B2	GFRA3, FAM183B, MARCKSL1, SOX4, SFRP5, SYNE4, TUBB2B, PHLDA1, RGCC, RPF2	GCH1, CHGA, TUBA1A, FAM183B, NEUROD1, RUNDC3A, CLDN4, BEX2, CPLX2, KRT20
Goblet	FCGBP, TFF3, AGR2, TPSG1, MUC2, CLCA1, KLK1, TXNDC5, ATOH1, SLC12A8	ST3GAL4, SLC51A, FABP6, PHGR1, 2200002D01RIK, CRIP1, SMIM24, REG3B, CCL25, REG3G	TFF3, AGR2, GUCA2A, MUC2, FCGBP, CLCA1, CCL9, KLK1, SERPINA1B, HSPA5	FCGBP, AGR2, TFF3, MUC2, TPSG1, SELM, SPINK4, KLK1, CLCA1, TXNDC5	CCND2, PHGR1, FAM13A, PELO, PHLDA1, SOAT1, ACTR2, VGLL4, SLC12A2, CRIP1	SPINK4, SERPINA1B, SCIN, NDRG1, WARS, GALNT12, FXYD3, S100A6, STARD10, GUCA2A
Paneth	DEFA26, DEFA3, GM21002, GM7849, GM10104, DEFA20, GM15315, GM15292, GM7861, CLPS	LYZ1, AY761184, DEFA24, GM15284, ITLN1, DEFA22, DEFA26, DEFA17, CLPS, DEFA21	DEFA-RS1, MPTX2, ANG4, AY761184, GM14851, ITLN1, DEFA22, LYZ1, DEFA21, GM15284	DEFA26, DEFA3, GM21002, GM7849, GM10104, GM15315, DEFA20, CLPS, GM15292, GM7861	DEFA24, PHLDA1, SYNE4, CITED4, VGLL4, SOAT1, FAM13A, SOX9, JUN, MARCKSL1	PNLIPRP2, CRIP1, GM21498, DEFA17, GM14851, GM10104, DEFA-RS1, GM15292, LYZ2, DEFA20
Stem	BEX1, RGCC, AMICA1, IFITM3, ASCL2, IGFBP4, LGR5, SP5, PDGFA, CDCA7	DMBT1, RBP7, HMGB2, BIRC5, FGFBP1, TUBA1B, 2810417H13RIK, GSR, SFN, KLF5	BEX1, IFITM3, CLCA3B, GUCA2B, SERPINB1A, SERPINB6A, TUBB5, 2210407C18RIK, ANXA5, NHP2	BEX1, IFITM3, AMICA1, CLCA3B, RGCC, ASCL2, HMGN1, SOX4, SLC12A2, IGFBP4	BEX1, IFITM3, AMICA1, ASCL2, RGCC, IGFBP4, CDCA7, LGR5, SLC12A2, SP5	RGCC, GUCA2A, AMICA1, CLCA3B, ASCL2, CRIP1, SLC12A2, SOX4, KRT19, TFF3
TA	DTL, PPWD1, RCL1, 4930524O07RIK, GINS2, MYC, GM42903, RRP1B, RRP15, A830080D01RIK	TFF3, AGR2, FCGBP, GUCA2A, SELM, SPINK4, MUC2, TXNDC5, TMSB10, TPSG1	CPS1, GINS2, DUT, AMICA1, RRP15, UNG, GMNN, EFNA4, MCM4, CDK5RAP3	CLCA3B, CPS1, GINS2, MYC, DUT, DTL, MCM7, IFITM3, DCTPP1, RCL1	DTL, MYC, GINS2, RCL1, NHP2, MCM7, RANBP1, MCM5, RRP15, LYAR	CTSH, MYC, LYAR, MCM3, ACTR2, DTL, MCM5, GSTA4, HMGN1, RARS2
Tuft	RGS13, SH2D6, LRMP, ALOX5AP, AVIL, DCLK1, HMX2, LTC4S, TRPM5, HCK	RANBP1, NHP2, CPS1, DCTPP1, DUT, MCM7, GINS2, LYAR, MYC, SNRPA1	HCK, LRMP, ALOX5AP, ADH1, FABP1, SNRNP25, TM4SF4, CD24A, MGST3, KRT18	RGS13, SH2D6, LRMP, ALOX5AP, AVIL, DCLK1, HMX2, LTC4S, TRPM5, HCK	SOX9, MARCKSL1, CITED4, SOX4, ATAT1, PHLDA1, CRIP1, ASCL2, LGR5, TUBB2B	ESPN, LIMD2, REEP5, FYB, PEA15A, CCDC109B, SNRNP25, TUBA1A, MATK, LY6G6D
Duodenum Sample
cell type	COSG	SC3	Seurat	SCMarker	scGeneFit	Comet
EP	RBP7, DMBT1, ARG2, CAR4, LMNA, SFN, HAO2, LDHA, GM3336, ELOVL6	MT1, KCNE3, TUBA1B, MT2, FGFBP1, CCDC34, DUT, 2700094K13RIK, LYAR, CKS1B	CDK2AP2, CES2G, LSM3, P4HB, PDHB, MT2, TMPO, DDX56, 2700029M09RIK, 9430038I01RIK	DMBT1, RBP7, ARG2, CAR4, KRT19, SMIM24, CES2E, LYPD8, ST3GAL4, CRIP1	DMBT1, RBP7, KRT19, LDHA, LYPD8, SFN, CDK2AP2, PRAP1, PHGR1, ABHD11OS	DMBT1, ST3GAL4, CDK1, RBP2, ETHE1, LMNA, ARG2, UBE2C, KRT8, KRT18
Enterocyte	GSTA1, REG3A, APOA1, ALPI, RBP2, SIS, MEP1B, CLEC2H, APOA4, KRT20	CD24A, ESPN, LRMP, CYSTM1, LTC4S, ADH1, MGST3, KRT18, REEP5, SH2D6	RBP2, APOA1, APOA4, REG1, APOC3, FABP1, REG3B, PRAP1, REG3G, FABP2	GSTA1, RBP2, ST3GAL4, ALPI, SIS, REG3A, APOA1, KRT20, SLC51A, MEP1B	LYPD8, PRAP1, KRT19, PHGR1, LDHA, CRIP1, FAM213B, KRT8, ABHD11OS, RBP7	RBP2, MEP1B, APOA1, SIS, CES2E, IL18, ANPEP, SLC51A, REG1, PLAC8
Enteroendocrine	GFRA3, NKX2-2, CHGB, APLP1, VWA5B2, NEUROG3, HMGN3, FEV, CHGA, INSM1	GKN3, IFITM3, SLC12A2, RGCC, HMGCS2, CLCA3B, ASCL2, IGFBP4, ACOT1, RPSA	CHGA, CHGB, RBP4, SCT, TAC1, CCK, GHRL, GCG, GIP, REG4	GFRA3, NKX2-2, CHGB, APLP1, NEUROG3, VWA5B2, HMGN3, FEV, CRYBA2, CHGA	GFRA3, MARCKSL1, SOX4, SLC25A4, SFRP5, PHLDA1, LBH, AURKA, SPC25, KRT8	NGFRAP1, CDKN1A, CRYBA2, SCGN, PCSK1N, ISL1, FAM183B, BEX2, CPE, RPH3AL
Goblet	FCGBP, AGR2, GUCA2A, TPSG1, MUC2, CCL9, TFF3, ATOH1, CREB3L1, REP15	TFF3, AGR2, FCGBP, SELM, TMSB10, GUCA2A, MUC2, SMIM6, TXNDC5, FXYD3	FCGBP, GUCA2A, CCL9, MUC2, CLCA1, AGR2, TFF3, SPINK4, TMSB10, ZG16	FCGBP, AGR2, GUCA2A, TFF3, MUC2, TPSG1, CCL9, SPINK4, SELM, ATOH1	PHGR1, HSP90B1, PHLDA1, CKS1B, CDK2AP2, LBH, TUBA1C, PMF1, KIF22, HMGB2	SELM, TPSG1, CCL9, ATOH1, GUCA2B, SMIM6, REP15, SMIM14, FXYD3, CREB3L1
Paneth	DEFA26, DEFA3, DEFA-RS7, GM15292, DEFA-RS1, GM7861, GM7849, DEFA17, DEFA23, CLPS	AY761184, GM15284, DEFA24, LYZ1, DEFA17, ITLN1, CLPS, GM14851, DEFA26, DEFA3	DEFA21, DEFA-RS1, CLPS, MPTX2, ANG4, DEFA17, GM14851, ITLN1, AY761184, LYZ1	DEFA26, DEFA3, GM15292, DEFA-RS7, DEFA-RS1, GM7861, DEFA17, GM7849, CLPS, DEFA23	DEFA24, LBH, GAS6, PHLDA1, RGCC, LGR5, CYP2E1, HMGCS2, GKN3, IGFBP4	MMP7, PNLIPRP2, DEFA22, REG4, CCL6, GUCA2B, PLAC8, MPTX2, NUPR1, LYZ2
Stem	GKN3, LGR5, HMGCS2, RGCC, IGFBP4, SP5, ACOT1, SLC12A2, PDGFA, CYP2E1	RBP2, SMIM24, FABP1, ST3GAL4, 2200002D01RIK, CES2E, ARG2, PLAC8, TM4SF5, PRAP1	GKN3, LGR5, CD74, HIST1H2BC, MT1, UBL4A, CYP2C65, RGN, TFPI, CREG1	GKN3, RGCC, SLC12A2, HMGCS2, LGR5, IGFBP4, ASCL2, ACOT1, CLCA3B, SP5	GKN3, HMGCS2, SLC12A2, RGCC, IGFBP4, LGR5, ACOT1, SP5, SFRP5, PDGFA	HMGCS2, DMBT1, IGFBP4, RGCC, ASCL2, ACOT1, LGR5, DYNLL1, CCL25, CRIP1
TA	CIT, TUBA1B, NUSAP1, MT2, CKAP2, UHRF1, CKS1B, LYAR, MT1, HIRIP3	TM4SF4, GFRA3, CDKN1A, SEPP1, KRT7, FAM183B, CHGB, DDC, NKX2-2, WBP5	TOP2A, GCAT, TIPIN, PRELP, DAPK2, FADS1, NSUN2, DNMT1, DNAJA3, NINJ1	MT1, TUBA1B, DMBT1, CLCA3B, MT2, UBE2C, FGFBP1, CENPA, CKS1B, SPC24	TUBA1B, CCND2, CKS1B, MT1, FGFBP1, UBE2C, LYAR, SPC24, HMGB2, PBK	TUBB4B, IFITM3, DMBT1, ASCL2, RBP7, RGCC, 2810417H13RIK, CLCA3B, CENPA, BIRC5
Tuft	LRMP, SH2D6, AVIL, ALOX5AP, SPIB, ESPN, LTC4S, DCLK1, TRPM5, RGS13	DMBT1, RBP7, CDK2AP2, SFN, GM1123, BIRC5, LMNA, CDCA3, TK1, SPC24	ALOX5AP, RGS13, LRMP, HCK, SNRNP25, ADH1, CD24A, CYSTM1, KRT18, ALDH2	LRMP, SH2D6, AVIL, ALOX5AP, ESPN, SPIB, LTC4S, DCLK1, TRPM5, RGS13	KRT8, CRIP1, MARCKSL1, PHLDA1, TUBB4B, SOX4, SLC25A4, TUBA1C, HSP90B1, ARL6IP1	FYB, CYSTM1, BPGM, ADH1, LIMD2, REEP5, MGST3, VAV1, LY6G6D, HPGDS
Jejunum Sample
cell type	COSG	SC3	Seurat	SCMarker	scGeneFit	Comet
EP	DMBT1, RBP7, LMNA, DUOXA2, SFN, GJB3, KRT19, GM1123, RRM2, GSR	AMICA1, IFITM3, CLCA3B, SLC12A2, GKN3, PDGFA, CDCA7, ASCL2, CD74, 2210407C18RIK	DMBT1, BIRC5, TK1, UBE2C, CCND1, CCNB2, CNNM4, PMPCA, MCM5, TIPIN	DMBT1, RBP7, CAR4, KRT8, LYPD8, GM1123, LMNA, SFN, ARG2, GSDMC4	DMBT1, LDHA, GSR, GM1123, CDK2AP2, FGFBP1, BIRC5, LSM3, CDCA3, TYMS	CCNA2, KRT19, DMBT1, PBK, LDHA, UBE2C, MKI67, RACGAP1, PLK1, H2AFX
Enterocyte	SPINK1, ANPEP, RBP2, APOA1, SLC51B, MEP1B, SIS, GSTA1, ST3GAL4, CLEC2H	GFRA3, CHGB, CHGA, MARCKSL1, KRT7, HMGN3, APLP1, DDC, VWA5B2, SEPP1	RBP2, APOA1, FABP1, APOA4, CRIP1, FABP2, REG3G, FABP6, SEPP1, REG1	ST3GAL4, SPINK1, RBP2, ANPEP, APOA1, SLC51A, CLEC2H, SLC51B, SIS, GSTA1	PRAP1, PHGR1, LDHA, MGST3, SLC39A5, GLRX, MT1, H2-AA, CD74, MT2	ADH6A, CYP4F14, CKMT1, KRT20, MEP1B, MOGAT2, REG3A, ANPEP, PRAP1, TM4SF5
Enteroendocrine	GFRA3, CHGB, HMGN3, VWA5B2, CELF3, FEV, CPE, NEUROG3, PCSK1N, CHGA	TUBA1B, TUBB5, CCDC34, 2700094K13RIK, DUT, CENPA, NUCKS1, LSM2, CKS1B, TMPO	CHGB, CHGA, TAC1, CCK, RBP4, SCT, GHRL, MYL7, FABP5, GIP	GFRA3, CHGB, HMGN3, VWA5B2, CHGA, NEUROG3, APLP1, CPE, CELF3, FEV	GFRA3, VWA5B2, MARCKSL1, BEX1, PHLDA1, NRN1, JUN, LBH, TMPO, DEFA24	TM4SF4, RPH3AL, CACNA1A, FFAR2, FAM183B, MARCKSL1, CDKN1A, CLDN4, GADD45A, CPE
Goblet	FCGBP, AGR2, TFF3, TPSG1, MUC2, ATOH1, REP15, CCL9, SPDEF, CLCA1	DEFA24, GM15284, LYZ1, AY761184, DEFA17, ITLN1, CLPS, ANG4, DEFA3, DEFA-RS1	FCGBP, MUC2, CLCA1, S100A6, TFF3, GUCA2A, AGR2, KLK1, ZG16, LYPD8	FCGBP, AGR2, TFF3, MUC2, TPSG1, SELM, GUCA2A, SPINK4, ATOH1, CCL9	PHGR1, GM1123, CCND2, H1F0, CDK2AP2, PHLDA1, LBH, CKS1B, SPC24, H2AFZ	SPINK4, TMSB10, KLK1, TSPAN13, SMIM14, S100A6, CREB3L1, SEC61B, DYNLL1, FXYD3
Paneth	DEFA26, GM7849, DEFA3, DEFA-RS7, GM15292, GM7861, CLPS, DEFA-RS1, DEFA23, DEFA17	SMIM24, ST3GAL4, 2200002D01RIK, CES2E, CRIP1, TM4SF5, CKMT1, CCL25, PLAC8, MDH2	MPTX2, DEFA-RS1, ANG4, DEFA17, DEFA22, ITLN1, DEFA21, AY761184, GM14851, LYZ1, GM15284	DEFA26, GM7849, DEFA3, DEFA-RS7, GM15292, CLPS, GM7861, DEFA-RS1, DEFA23, DEFA17	DEFA24, LBH, PHLDA1, LGR5, BEX1, RGMB, JUN, MARCKSL1, PDGFA, GKN3	MMP7, PNLIPRP2, REG4, KRT8, BAMBI, DEFA21, DEFA24, GM15299, GM15315, DEFA22
Stem	PDGFA, GKN3, LGR5, 2210407C18RIK, SP5, RGCC, BEX1, AMICA1, IGFBP4, RGMB	TFF3, FCGBP, AGR2, SELM, TMSB10, GUCA2A, TXNDC5, MUC2, SMIM6, SH3BGRL3	GKN3, CLCA3B, TUBB4B, BEX1, CDK1, LY6E, TUBB5, PIGK, PAPSS1, LSM2	AMICA1, GKN3, PDGFA, CLCA3B, 2210407C18RIK, LGR5, SLC12A2, RGCC, ASCL2, CDCA7	GKN3, PDGFA, LGR5, 2210407C18RIK, SP5, IGFBP4, RGMB, BEX1, JUN, NRN1	PDGFA, CRIP1, 2210407C18RIK, GKN3, CD74, LDHA, CLCA3B, H2-EB1, GLRX, IGFBP4
TA	TUBA1B, NUCKS1, CENPA, CCNB1, LOCKD, UBE2C, ASPM, TOP2A, H2AFX, 2700094K13RIK	DMBT1, KRT19, RBP7, GM1123, SFN, GSR, 2810417H13RIK, LMNA, HMGB2, BIRC5	CCDC34, AMICA1, SMC4, CDCA8, GEMIN6, CENPH, RGCC, ID1, ZFP703, CUX1	TUBA1B, CLCA3B, KCNE3, BIRC5, CCDC34, UBE2C, H2AFX, TOP2A, CENPA, 2700094K13RIK	TUBA1B, TOP2A, H2AFX, NUCKS1, CCDC34, HMGB2, 2700094K13RIK, CENPA, UBE2C, LOCKD	IFITM3, CCNB1, DMBT1, ASCL2, UBE2C, H2AFX, CDC20, MT2, AMICA1, CENPA
Tuft	AVIL, LRMP, RGS13, TRPM5, SH2D6, ALOX5AP, SPIB, DCLK1, HCK, SH2D7	CD24A, LTC4S, ESPN, LRMP, MGST3, ALDH2, AVIL, ADH1, ALOX5AP, RGS13	HCK, ALOX5AP, RAC2, LRMP, ADH1, TM4SF4, CD24A, SNRNP25, KRT18, CYSTM1	LRMP, RGS13, AVIL, ALOX5AP, TRPM5, SH2D6, SPIB, DCLK1, HCK, LTC4S	MGST3, MARCKSL1, PHLDA1, TUBB4B, LDHA, ARL6IP1, GFRA3, H1F0, H2AFX, VWA5B2	ESPN, PLCG2, TUBA1A, ADH1, TSPAN6, CD24A, KCTD12, ATP2A3, REEP5, LIMD2

## Sheet: GeneEditing
Unedited Sample
cell type	COSG	SC3	Seurat	SCMarker	scGeneFit	Comet
CD4	FHIT, ADTRP, AK5, CHRM3-AS2, LEF1, TRABD2A, CD40LG, MLLT3, NOG, MAL	LST1, FCGR3A, MS4A7, TCF7L2, IFITM3, AIF1, LRRC25, COTL1, SMIM25, HMOX1	FHIT, LEF1, BCL11B, NOSIP, PCED1B-AS1, GIMAP7, RGCC, DDIT4, TRDC, TOB1	FHIT, LEF1, ITM2A, LDHB, BCL11B, CHRM3-AS2, MAL, PRKCQ-AS1, OXNAD1, TRABD2A	FHIT, LEF1, TRABD2A, OXNAD1, RPS12, MAL, LDHB, PRKCQ-AS1, LEPROTL1, RPS18	CHRM3-AS2, RPS12, CYBA, TRABD2A, CD40LG, ITM2A, SRGN, SOCS3, LDHB, TRAT1
CD8a	SLC4A10, IL23R, RORC, CXCR6, NCR3, GZMK, CCL20, LINC01644, ARHGEF39, SCART1	LEF1, ITM2A, BCL11B, FHIT, NOSIP, TCF7, MAL, CAMK4, CHRM3-AS2, TRABD2A	CCL20, SPOCK2, AQP3, TNFAIP3, AC109326.1, TNF, PDE4D, FAM177A1, JUNB, SNORD3B-1	NCR3, GZMK, SLC4A10, LYAR, KLRB1, TRGC2, IL23R, SPOCK2, KLRG1, RORC	NCR3, KLRB1, SPOCK2, LYAR, TRGC2, SLC4A10, GZMK, TNFAIP3, IL23R, KLRG1	SLC4A10, SPOCK2, TLE1, IL7R, CA2, RF00003.10, IL23R, NCR3, DUSP1, AQP3
CD8na	CD8B, LINC02446, NELL2, S100B, CLEC11A, CD8A, CARS, SFRP5, PCSK1N, APBA2	LYZ, FCN1, VCAN, MPEG1, CSTA, CEBPD, CD14, TYMP, SLC11A1, CEBPB	LINC02446, NELL2, RPS12, PDE3B, FLT3LG, CCR7, CCDC57, TUBB2A, LINC00861, HSPD1	CD8B, LINC02446, NELL2, CD8A, NUCB2, LEF1, OXNAD1, PDE3B, LDHB, S100B	CD8B, LINC02446, NELL2, RPS12, RPS18, LEPROTL1, PDE3B, OXNAD1, LEF1, LDHB	RPS12, CARS, PASK, CLEC11A, RPS18, CD8A, LYPD3, CCR7, CYBA, APBA2
FCGR3A+ Mono	AC104809.2, CDKN1C, LINC02432, ZDHHC1, CLEC4F, KNDC1, LINC02345, SCGB3A1, TPPP3, AC106712.1	IGHM, CD37, IGHD, CD79A, LINC00926, FCER2, FCRL1, CD22, VPREB3, ARID5B	CDKN1C, KLF4, LST1, AIF1, COTL1, SAT1, ANXA1, HSPA1A, HSP90AA1, HSPA8	AC104809.2, CDKN1C, CSF1R, MS4A7, LINC02432, ZDHHC1, FCGR3A, TCF7L2, HMOX1, CAMK1	COTL1, FTL, FTH1, PSAP, GNAI2, CTSS, OAZ1, S100A4, BRI3, ZEB2	CDKN1C, CSTB, LMO2, NPC2, CAMKK1, KLF4, LILRB1, SIGLEC10, LGALS9, TNFSF10
Granulo	CD177, ALPL, S100P, MMP9, FCGR3B, ZDHHC19, CMTM2, PGLYRP1, ANXA3, CYSTM1	BANK1, MS4A1, EZR, TNFRSF13C, LY9, CD52, P2RX5, CD40, BLK, EBF1	CD177, PGLYRP1, MMP9, ARG1, LTF, S100A12, OLFM4, DEFA3, RETN, IER2	CD177, CSF3R, CYSTM1, ALPL, S100P, MCEMP1, S100A12, ALOX5AP, MMP9, S100A8	FRMD4B, TMEM40, SMIM5, CST7, KLK1, PIKFYVE, CPNE5, RORC, IGHG1, KIF5C	CD177, CD52, ALOX5AP, S100A8, CYSTM1, BASP1, CSF3R, ACTB, JUN, GCA
Mono	VCAN, FCN1, CD36, MPEG1, CD14, CD300E, AC020656.1, LYZ, ASGR1, CSTA	CST3, HLA-DPB2, WFDC21P, NAPSB, CYP2S1, HOMER2, ATP1B1, NRARP, LGMN, CCDC88A	VCAN, CD14, G0S2, CXCL8, SRGN, NEAT1, HBA2, HBA1, H3F3B, HBB	VCAN, FCN1, LYZ, MPEG1, CD300E, CST3, CD14, AC020656.1, CD36, CSTA	MPEG1, FCN1, CTSS, SLC11A1, TYMP, CSTA, LYZ, APLP2, CEBPB, S100A4	S100A9, MPEG1, S100A12, S100A8, CSF3R, CEBPD, S100A10, SLC11A1, SRGN, AC020656.1
NK	KLRD1, GZMH, GZMB, FGFBP2, NKG7, CCL4, GNLY, CTSW, IFNG, GZMA	S100A8, ACTB, S100A9, S100A12, CSF3R, NAMPT, BASP1, ALOX5AP, CD177, CXCL8	GZMB, CCL4, CCL5, GNLY, XCL2, CCL4L2, IL32, CCL3, PTGDS, CD69	NKG7, KLRD1, GZMB, GZMH, CCL5, FGFBP2, GZMA, CTSW, CCL4, GNLY	CST7, GZMA, APOBEC3G, RUNX3, LYAR, LINC01871, LAG3, SYNE2, SH2D2A, DUSP2	GNLY, CST7, CLIC3, IFNG, C12ORF75, CTSW, GZMM, SPON2, RUNX3, SAMD3
Plasmablasts	MIXL1, CCR10, CNKSR1, TNFRSF17, PSAT1, B9D1, BMP8B, IGHV3-30, HID1, TXNDC5	RGS18, HIST1H2AC, GNG11, NRGN, TSPAN33, PF4, PPBP, RUFY1, CAVIN2, GP9	IGLV6-57, MZB1, JCHAIN, IGHA1, IGKC, SEC11C, HSP90B1, PPIB, SSR4, TMSB10	JCHAIN, TNFRSF17, MZB1, DERL3, IGHA1, AL133467.1, ITM2C, ZBTB32, HID1, NT5DC2	TMSB10, CPNE5, CYBA, SEL1L3, LTK, CLIC1, PERP, TNFRSF13B, AQP3, CARS	SORBS2, DERL3, SEC11C, UFSP1, MANEA, SUB1, IGKC, PSAT1, ITM2C, KDELR2
Platelet	CMTM5, GNAZ, GFI1B, TMEM40, GP9, SMIM5, SH3BGRL2, ALOX12, PTGS1, TUBB1	EGLN3, BX571818.1, WASF1, PLD4, TNFRSF21, CBFA2T3, SPIB, MZF1-AS1, TUBB6, GRAMD4	TUBB1, CAVIN2, GNG11, PF4, PF4V1, PPBP, RUFY1, NRGN, PRKAR2B, OAZ1	CAVIN2, GP9, ITGA2B, GNG11, CMTM5, PTGS1, TUBB1, PF4, RGS18, NRGN	TMEM40, SMIM5, GPX1, RGS10, OAZ1, CA2, CPNE5, SH3BGRL3, RAC1, LMNA	SH3BGRL2, ITGA2B, AC147651.1, TUBB1, TPM1, RAB32, PF4V1, MARCH2, DMTN, MPP1
Treg	TNFRSF4, AC133644.2, CTLA4, ZC3H12D, CCR4, TTC39C-AS1, ICOS, IL2RA, TBC1D4, NPDC1	SPOCK2, IL7R, DUSP2, LYAR, DUSP1, TNFAIP3, NCR3, GZMK, CD69, JUN	TNFRSF4, IL7R, LTB, ITM2A, RORA, TRBC2, TRBC1, RTKN2, TENT5C, ISG15	TNFRSF4, IL7R, AC133644.2, CD2, CTLA4, ICOS, ZC3H12D, CD28, MAF, CORO1B	MAF, RORA, LDHB, DUSP16, LMNA, SPOCK2, LEPROTL1, AQP3, MAL, RPS18	MAL, KLRB1, LTB, ITGB1, NPDC1, CORO1B, TNFRSF25, LDHB, TBC1D4, PASK
mDC	AC131097.4, FCER1A, HLA-DPB2, FLT3, AP001962.1, AC106865.1, APOC1, SDS, PTPN20, VSIG4	JCHAIN, MZB1, DERL3, IGHA1, ITM2C, TNFRSF17, CCR10, CNKSR1, CADM1, AL133467.1	CST3, HLA-DQA1, HLA-DQB1, HLA-DRA, HLA-DRB1, HLA-DPA1, HLA-DPB1, CD74, FTH1, ACTB	HLA-DPB2, CLIC2, ATP1B1, CYP2S1, NRARP, AC026369.3, LGMN, NAPSB, CD1C, CDC42EP4	GPR183, TMSB10, CREM, RAC1, RGS10, FTH1, IL4I1, LYZ, COTL1, CLIC1	SNX3, CST3, NAPSB, AREG, HLA-DRA, RNH1, GSTP1, PPA1, POLQ, AC020656.1
memory B cells	TNFRSF13B, KLK1, IGHG2, IGHG3, CLECL1, CD70, IGHG1, SHISA8, ARHGAP24, SOX5	NKG7, CST7, GZMA, GZMM, KLRD1, CTSW, CCL4, GZMB, GZMH, FGFBP2	KLK1, BANK1, MS4A1, CD79A, CD1C, CD79B, EZR, PHACTR1, IGHM, RPS18	TNFRSF13B, BANK1, MS4A1, KLK1, CLECL1, HLA-DQB1, HLA-DQA1, IGHG2, IGHG3, CD70	BANK1, TNFRSF13B, ARHGAP24, OSBPL10, CLECL1, IGHG2, SEL1L3, CPNE5, CD70, PIKFYVE	HLA-DPB1, CLECL1, MS4A1, HLA-DQB1, KLK1, HLA-DQA1, BANK1, CD70, IGHA1, IGHG1
naive B cells	IGHD, IGHM, FCER2, FCRL1, AL139020.1, PLPP5, LINC00926, LINC02397, CD79A, TSPAN13	CD8B, RPS12, LINC02446, RPS18, NELL2, CD8A, LDHB, LEPROTL1, PCED1B-AS1, OXNAD1	LINC00926, NEIL1, IGLC2, CENPM, IGLC6, DUSP2, GRASP, DOP1B, EGR1, HIST1H1C	IGHD, IGHM, CD79A, HLA-DQA1, HLA-DQB1, LINC00926, FCER2, FCRL1, MS4A1, HLA-DRB1	BANK1, TLE1, OSBPL10, CCR7, CD69, SEL1L3, CA2, FOS, FOSB, CPNE5	HLA-DPA1, AL139020.1, PLPP5, FCER2, HLA-DPB1, FCRL1, HLA-DRA, VIM, GAPDH, SRGN
pDC	EGLN3, GIPC3, SLC32A1, PHEX, ACOXL, LAMP5, TTC39A, CLEC4C, IGHV3-48, FAM47E	CD2, LTB, TRAC, RGCC, RCAN3, GIMAP7, TRBC2, ICOS, TRAT1, MAF	cell number low	BX571818.1, WASF1, TNFRSF21, PLD4, IRF4, CRYM, AC005332.7, PACSIN1, LINC00996, AC119428.2	FOSB, MALAT1, PIKFYVE, FOS, SEL1L3, SMIM5, AC245014.3, DUSP1, ACP5, ZFP36	HSPA5, PMEPA1, DERL3, AL139020.1, AC010761.1, HERPUD1, NAPSB, IRF7, LILRB4, CCDC50
Modified Sample
cell type	COSG	SC3	Seurat	SCMarker	scGeneFit	Comet
CD4	FHIT, ADTRP, MAL, TCF7, PRKCQ-AS1, BCL11B, CSGALNACT1, CHRM3-AS2, ITGA6, LEF1	TCF7, BCL11B, MAL, FHIT, CHRM3-AS2, ADTRP, ITGA6, ANK3, ZNF815P, VSIG1	FHIT, MAL, TCF7, BCL11B, PRKCQ-AS1, PCED1B-AS1, LEF1, CHRM3-AS2, RCAN3, SOCS3	FHIT, MAL, TCF7, BCL11B, PRKCQ-AS1, IL7R, ADTRP, LEF1, TRBC2, CHRM3-AS2	FHIT, MAL, PRKCQ-AS1, RPS12, TCF7, RPS8, RPS18, LEF1, CHRM3-AS2, CCR7	FHIT, S100A4, RPS12, RPS8, MAL, PRKCQ-AS1, FOS, DUSP1, TRBC1, BCL11B
CD8a	SLC4A10, GZMK, LYAR, NCR3, SCART1, KLRG1, TSPAN15, SYTL2, KLRB1, ZBTB16	IGHM, IGHD, CD79A, LINC00926, CD79B, MEF2C, PLPP5, MT-CO2, AL139020.1, FCER2	LYAR, NCR3, KLRB1, LINC01871, AC109326.1, TRDC, AC245014.3, TNFAIP3, CITED2, AC044849.1	GZMK, LYAR, SLC4A10, NCR3, KLRB1, CCL5, KLRG1, DUSP2, TRGC2, IL32	LYAR, KLRB1, GZMK, NCR3, SLC4A10, KLRG1, TRGC2, DUSP2, IL32, LINC01871	SLC4A10, LYAR, CCL5, LTB, NKG7, JUN, GZMA, TMSB10, AQP3, IL7R
CD8na	CD8B, LINC02446, NELL2, S100B, CARS, LRRN3, REG4, DSEL, CD248, MXRA8	LYZ, FCN1, TYMP, CYBB, CTSS, AC020656.1, LGALS1, VCAN, MS4A6A, FGL2	LINC02446, RPS18, CARS, OXNAD1, TCF7, BCL11B, DNAJB1, AC103591.3, MALAT1, GBP5	CD8B, LINC02446, NELL2, S100B, CARS, CD8A, LRRN3, OXNAD1, PRKCQ-AS1, LEF1	CD8B, LINC02446, NELL2, RPS12, RPS18, RPS8, CARS, CD8A, LRRN3, RPS19	RPS12, CARS, S100B, YBX3, CD8B, AC245014.3, PRKCQ-AS1, TMEM14C, RNVU1-19, CLEC11A
FCGR3A+ Mono	CDKN1C, AC104809.2, HES4, FCGR3A, SIGLEC10, NR4A1, MS4A7, ZNF703, CKB, C1QA	NKG7, CCL5, CST7, HCST, GZMA, KLRD1, IL32, GZMH, GZMM, GNLY	LYPD2, LST1, STXBP2, FCER1G, RHOB, S100A11, SAT1, FTH1, FTL, CCL3L1	CDKN1C, MS4A7, FCGR3A, HES4, AC104809.2, CFD, NR4A1, TCF7L2, SIGLEC10, RHOC	S100A4, OAZ1, DUSP1, PSAP, EMP3, CTSS, TYMP, SH3BGRL3, MT-CO1, MT-CO2	FCGR3A, AC104809.2, ZNF703, AIF1, CKB, MS4A7, GPBAR1, MTSS1, FTH1, LST1
Granulo	FCGR3B, CMTM2, NAMPT, CSF3R, SLC25A37, CXCR2, G0S2, VNN2, CYP4F3, MME	LYAR, GZMK, IL7R, DUSP2, NCR3, JUN, KLRG1, PIK3R1, TRGC2, TNFAIP3	FCGR3B, CMTM2, MNDA, NAMPT, CXCL8, IFIT2, IFITM2, MMP9, ISG15, TNFSF13B	FCGR3B, NAMPT, MNDA, CSF3R, CMTM2, S100A9, S100A8, IFITM2, SLC25A37, CXCL8	FCGR3B, AIM2, DUSP1, IL18RAP, SOX5, LINC01781, SSPN, EML6, SLC4A10, SHISA8	S100A9, JUNB, S100A8, SLC25A37, CMTM2, SAT1, S100A11, SOD2, CXCL8, BASP1
Mono	VCAN, AC020656.1, CD36, FCN1, LYZ, CD14, MS4A6A, CYBB, LGALS2, KCTD12	HLA-DRA, HLA-DPA1, HLA-DPB1, HLA-DRB1, HLA-DQB1, HLA-DQA1, CST3, CD74, HLA-DMA, NAPSB	LYZ, FCN1, MARCKS, S100A8, S100A9, NEAT1, MT-RNR2, MT2A, C1QA, MT1X	VCAN, LYZ, AC020656.1, FCN1, CYBB, LGALS2, MS4A6A, CD36, CST3, PSAP	LYZ, CYBB, CTSS, TYMP, VCAN, FCN1, GPX1, CD36, PSAP, SH3BGRL3	S100A9, HLA-DRA, S100A8, LGALS1, FTL, CTSS, CD36, AP1S2, HLA-DRB1, GSTP1
NK	KLRD1, NKG7, GZMH, GNLY, CST7, FGFBP2, CTSW, GZMA, PRF1, CCL5	CD8B, RPS12, RPS18, LINC02446, RPS8, PCED1B-AS1, RPS19, PRKCQ-AS1, CD3G, NELL2	NKG7, CCL5, GZMA, CTSW, GNLY, GZMK, STMN1, HMGB2, TRAC, TUBA1B	NKG7, KLRD1, CST7, CCL5, GZMH, GZMA, GNLY, CTSW, FGFBP2, PRF1	NKG7, CCL5, CST7, GZMA, PRF1, HCST, MATK, TRDC, IL32, S1PR5	C12ORF75, IL32, CYTOR, NKG7, TMSB4X, SPON2, EFHD2, GZMM, CCL4, CCL5
Plasmablasts	TNFRSF17, CAV1, HRASLS2, IGLV3-21, LINC01358, AP002852.1, IGHA1, UBE2C, LINC02245, B4GALT2	LTB, TRAC, TRBC1, CD2, TNFRSF25, MAF, ITM2A, TNFRSF4, TRAT1, HIST1H1D	IGLV3-21, IGLL5, MZB1, IGHG1, JCHAIN, IGHA1, IGHG4, IGKC, SSR4, IGLC3	IGHA1, JCHAIN, MZB1, IGHG1, IGHG4, DERL3, HRASLS2, ITM2C, ELL2, TXNDC5	POU2AF1, ERN1, TNFRSF13B, CLECL1, FCRL5, PLPP5, RF00012.43, AC109326.1, RF00003.10, CLIC1	SUB1, HSP90B1, STAM-AS1, B9D1, TMSB4X, HRASLS2, LINC02245, IGLL5, IGLV3-21, PPIB
Treg	TNFRSF4, AC133644.2, NEFL, MAF, TTC39C-AS1, FOXP3, TNFRSF25, IL2RA, GADD45G, TRADD	MS4A1, BANK1, RALGPS2, TNFRSF13C, ADAM28, BLK, PKIG, FAM30A, IGHG3, EZR	IL7R, CD2, GADD45G, TRBC1, TRBC2, ITM2A, LIMS1, CD69, CLDND1, SLFN5	TNFRSF4, MAF, IL32, ITGB1, TNFRSF25, TRAC, AQP3, IL7R, KLRB1, NPDC1	MAF, IL32, NPDC1, MAL, RORA, PASK, KLRB1, RPS18, SYNE2, RPS8	RNASET2, IL32, LIMS1, TRAC, CD2, MAL, AHNAK, ANXA1, S100A10, IL7R
mDC	CD1C, FCER1A, ENHO, CLEC10A, PKIB, FLT3, CD1E, AC092809.2, ATP1B1, PON2	LILRA4, PLD4, TPM2, PPP1R14B, TCF4, SEC61B, ITM2C, C12ORF75, TSPAN13, UGCG	HLA-DQB1, CST3, HLA-DRA, HLA-DRB1, HLA-DPA1, HLA-DPB1, CD74, ACTB, TMSB4X, TMSB10	CD1C, ENHO, CLEC10A, FCER1A, HLA-DQA1, HLA-DQB1, NAPSB, FLT3, PKIB, IL18	TMSB10, MT-CO1, MT-CO2, MAP3K8, GAPDH, MT-RNR2, GPX1, CLIC1, ANXA1, ARL4C	CD74, PON2, GPAT3, IL18, TSPAN33, BATF3, HLA-DMA, NAPSB, UTF1, FLT3
memory B cells	TNFRSF13B, SHISA8, IGHG3, IGHG2, LINC01781, SOX5, EML6, SSPN, IGHA2, MS4A1	FCGR3A, LST1, AIF1, FTH1, COTL1, MS4A7, FTL, CFD, HES4, PSAP	MS4A1, CD79A, CD79B, SMIM14, EZR, ATP2B1, ODC1, CLIC1, LTB, ACTG1	MS4A1, TNFRSF13B, BANK1, IGHG3, CD79A, IGKC, SHISA8, ADAM28, RALGPS2, HLA-DQA1	MS4A1, BANK1, BLK, IGHG3, TNFRSF13B, ADAM28, SHISA8, IGHG2, CD19, SPIB	MS4A1, TNFRSF13B, IGHA1, IGHG2, BANK1, CD79A, SHISA8, IGHG1, IGKC, IGHG3
naive B cells	IGHD, IGHM, FCER2, LINC00926, AL139020.1, PLPP5, CD79A, FCRL1, VPREB3, AFF3	S100A9, MNDA, IFITM2, S100A8, NAMPT, FCGR3B, NEAT1, SRGN, CSF3R, JUNB	IGHM, LINC00926, FCER2, TNFRSF13C, PLPP5, RALGPS2, MEF2C, IGLC6, IL4R, STX7	IGHM, IGHD, LINC00926, CD79A, AL139020.1, FCER2, MS4A1, PLPP5, IGKC, CD79B	IGHM, FCER2, PLPP5, FCRL1, AFF3, BANK1, AL139020.1, MS4A1, BCL7A, IL4R	CD74, FCER2, AL139020.1, AFF3, PLPP5, HLA-DQA1, CD79B, HVCN1, BIRC3, IGKC
pDC	LILRA4, SCT, CLEC4C, AL357143.1, PTCRA, SMIM5, LINC00996, TPM2, LRRC26, SERPINF1	SEC11C, JCHAIN, IGHA1, SUB1, MZB1, UBE2J1, SSR3, MANF, SEL1L3, HSPA5	SCT, TPM2, CCDC50, C12ORF75, AL139020.1, ALOX5AP, PPP1R14B, TXN, PLAC8, SOX4	LILRA4, TPM2, SERPINF1, SCT, PLD4, SMIM5, LINC00996, ITM2C, PTCRA, IL3RA	SPIB, AL139020.1, BCL7A, GPX1, CLECL1, LTK, ARL4C, B4GALT1, RNU2-63P, ERN1	SPCS1, DERL3, ZFAT, UGCG, C12ORF75, IL3RA, NAPSB, CLEC4C, HSP90B1, TSPAN13
